# Supplementary material for: Surface spermidine functionalized PEGylated poly(lactide-co-glycolide) nanoparticles for tumor-targeted drug delivery
Source: Royal Society of Chemistry journal article supplement (doi:10.1039/c7ra02447a), 2017-01-01
Supplement: c7ra02447a1.pdf [file c7ra02447a1.pdf]

**Supplementary information for:**

**Surface Spermidine Functionalized PEGylated Poly (lactide-co-glycolide)  
Nanoparticles for Tumor-targeted Drug Delivery**

Jianming Li<sup>a</sup>, Juan Mao<sup>a</sup>, Jing Tang<sup>b</sup>, Guo Li<sup>a</sup>, Fengling Fang<sup>a</sup>, Yana Tang<sup>a</sup>,  
Jinsong Ding<sup>a, \*</sup>

<sup>a</sup> Xiangya School of Pharmaceutical Sciences, Central South University, Changsha 410013, Hunan, China.

<sup>b</sup> Department of Pharmaceutics, Changsha Medical University, Changsha 410219, Hunan, China

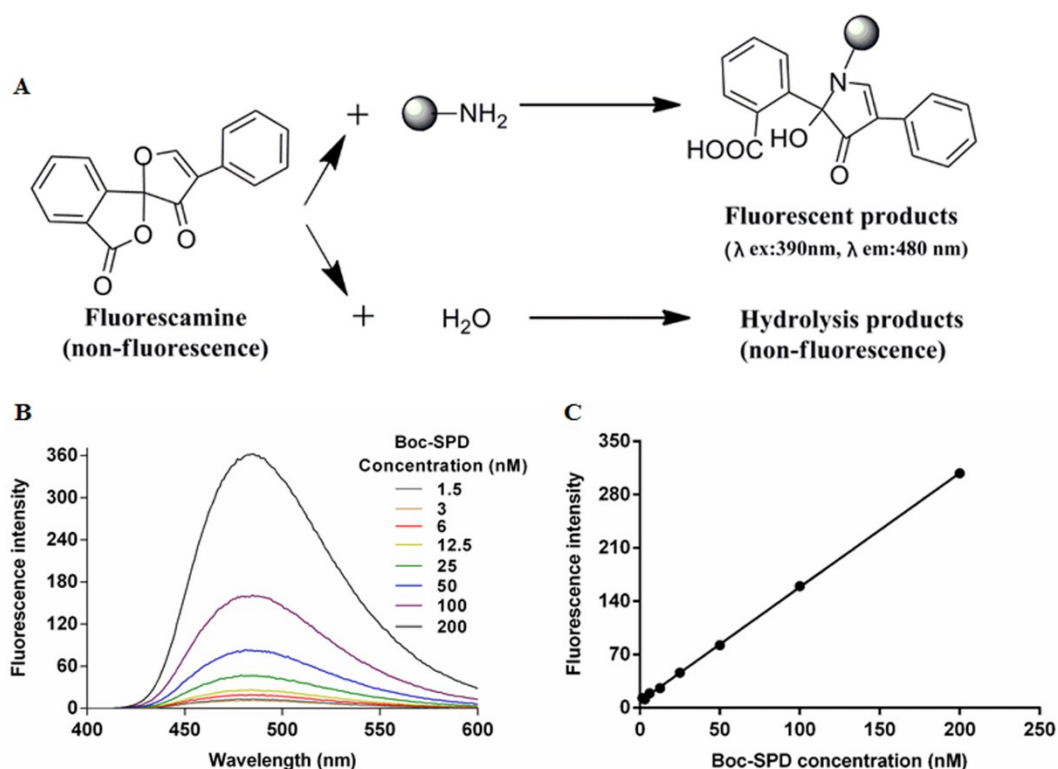

Fig.S1 (A) Scheme of the reaction between fluorescamine and a primary amine; (B) Fluorescence spectra of Boc-SPD calibrating solutions; (C) Standard curve of fluorescence intensity to Boc-SPD concentration at 480 nm.

\* Address for correspondence: Xiangya School of Pharmaceutical Sciences, Central South University, Changsha 410013, Hunan, China.  
E-mail addresses: dingjs0221@163.com; Fax: +86-731-82650442; Tel: +86-731-82650250

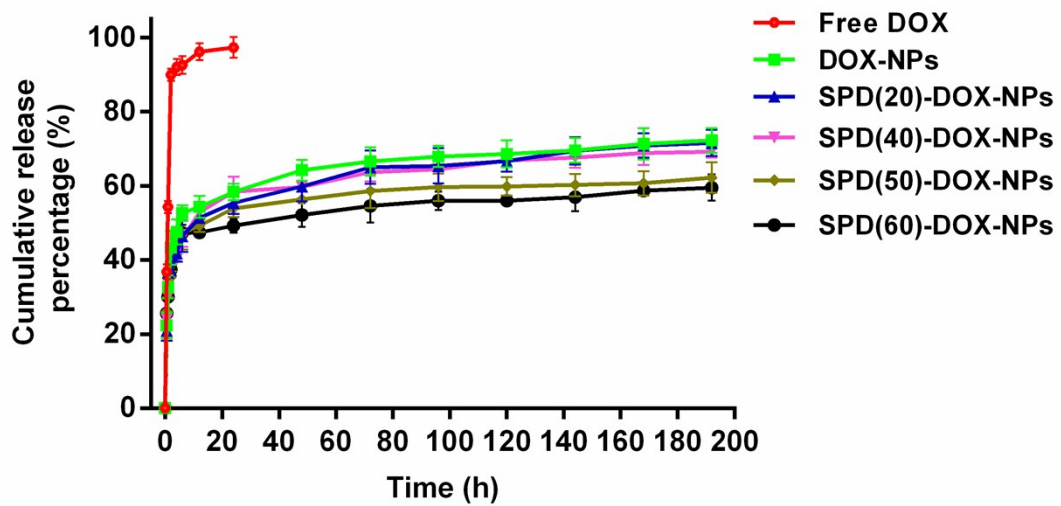

Fig.S2 *In vitro* release profiles of DOX from DOX-NPs and SPD-DOX-NPs with different SPD contents on NPs surface in PBS (pH 7.4) with 0.05 % SDS at 37 °C for 192 h. Data were shown as mean  $\pm$  SD (n=3).

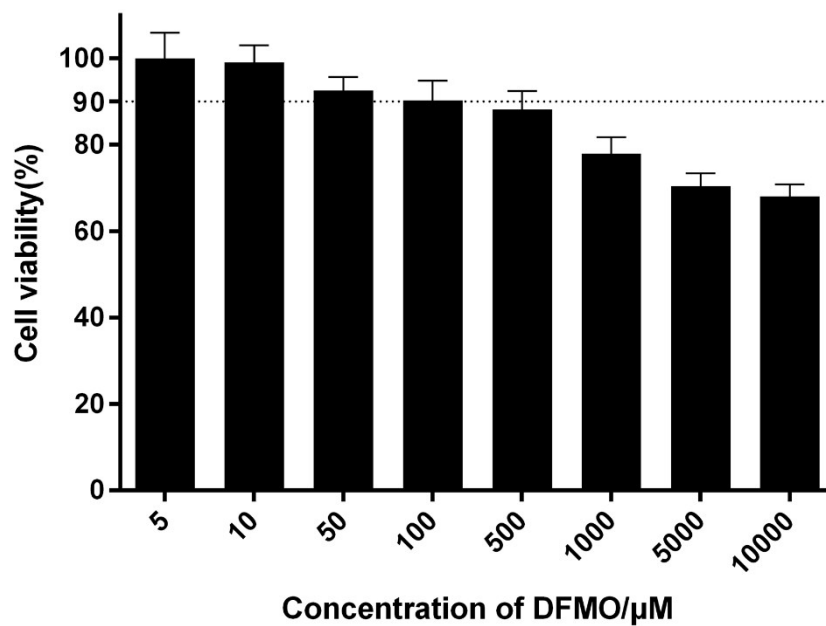

Fig.S3 *In vivo* cytotoxicity of DFMO on A549 cells for 24 h. Data were shown as mean  $\pm$  SD (n=4)

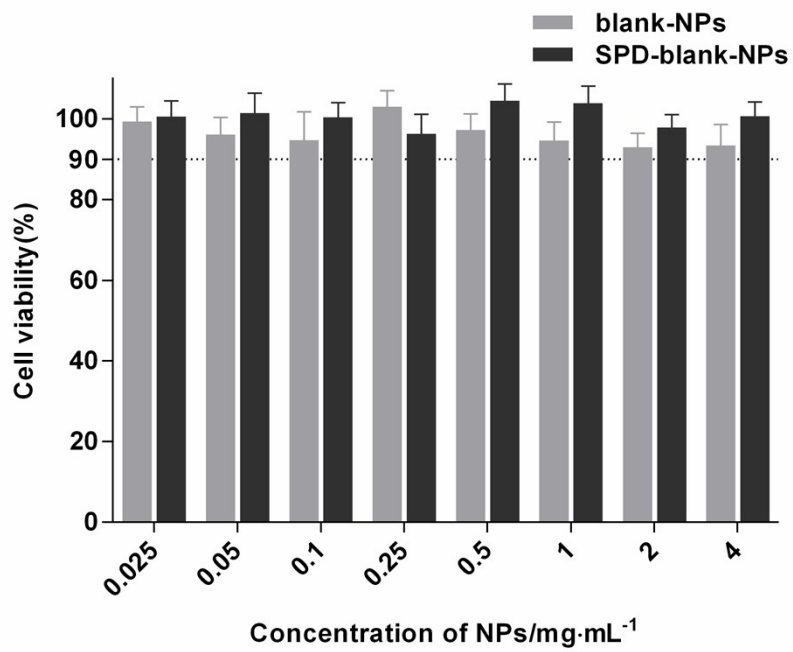

Fig.S4 *In vivo* cytotoxicity of blank NPs and SPD-NPs on A549 cells according to polymer concentrations for 24 h. Data were shown as mean  $\pm$  SD (n=4)
